# Supplementary material for: Genome-wide identification of ATP binding cassette (ABC) transporter and heavy metal associated (HMA) gene families in flax (Linum usitatissimum L.)
Source: BMC Genomics. 2020 Oct 19;21:722. doi: 10.1186/s12864-020-07121-9 (PMC7574471; doi:10.1186/s12864-020-07121-9)
Supplement: Supplementary file 5 — Additional file 5: Table S4. List of HMA genes identified in different species. [file 12864_2020_7121_MOESM5_ESM.xlsx]

## Sheet: Table S4
Table S4. List of HMA genes identified in different species.
Species	Subfamiles	Gene ID
	I	Lus10011510
	I	Lus10019313
	II	Lus10038364
	II	Lus10036225
	II	Lus10031273
Linum usitatissimum	II	Lus10031840
	II	Lus10008309
	III	Lus10009789
	III	Lus10038070
	III	Lus10023777
	IV	Lus10025467
	IV	Lus10006955
	I	AT4G37270
	II	AT1G63440
	II	AT5G44790
	III	AT4G33520
Arabidopsis thaliana	III	AT5G21930
	IV	AT4G30110
	IV	AT4G30120
	IV	AT2G19110
	I	Potri 007G049000
	II	Potri 003G075700
	II	Potri 001G158900
	II	Potri 001G019100
Populus trichocarpa	II	Potri 003G125700
	II	Potri 003G125600
	II	Potri 001G105800
	III	Potri 006G220201
	III	Potri 018G047800
	III	Potri 003G024000
	III	Potri 001G205400
	IV	Potri 006G076900
	I	GSVIVT01000217001
	II	GSVIVT01012131001
Vitis vinifera	II	GSVIVT01025299001
	II	GSVIVT01019769001
	III	GSVIVT01035474001
	III	GSVIVT01038740001
	III	GSVIVT01038742001
	IV	GSVIVT01010896001
	I	Bradi1g33347
	II	Bradi1g31987
Brachypodium distachyon	II	Bradi3g05340
	II	Bradi3g07110
	II	Bradi5g17990
	III	Bradi1g72790
	III	Bradi3g38790
	IV	Bradi1g34140
	IV	Bradi1g53670
