# Supplementary material for: Genome-wide identification of ATP binding cassette (ABC) transporter and heavy metal associated (HMA) gene families in flax (Linum usitatissimum L.)
Source: BMC Genomics. 2020 Oct 19;21:722. doi: 10.1186/s12864-020-07121-9 (PMC7574471; doi:10.1186/s12864-020-07121-9)
Supplement: Supplementary file 7 — Additional file 7: Table S6. Gene ontology (GO) of ABC transporter and HMA genes in flax. [file 12864_2020_7121_MOESM7_ESM.xlsx]

## Sheet: Table S6
Table S6. Gene ontology (GO) of ABC transporter and HMA genes in flax.
Gene	GO ID	GO function	Function category	Roles of gene
ABC transporter	GO:0005524	ATP binding	molecular_function	Interacting selectively and non-covalently with ATP, adenosine 5'-triphosphate, a universally important coenzyme and enzyme regulator.
	GO:0006810	transport	biological_process	The directed movement of substances (such as macromolecules, small molecules, ions) into, out of or within a cell, or between cells, or within a multicellular organism by means of some agent such as a transporter or pore.
	GO:0016021	integral component of membrane	cellular_component	The component of a membrane consisting of the gene products and protein complexes having at least some part of their peptide sequence embedded in the hydrophobic region of the membrane.
	GO:0016887	ATPase activity	molecular_function	Catalysis of the reaction: ATP + H2O = ADP + phosphate + 2 H+. May or may not be coupled to another reaction.
	GO:0042626	ATPase activity, coupled to transmembrane movement of substances	molecular_function	Catalysis of the reaction: ATP + H2O = ADP + phosphate, to directly drive the active transport of a substance across a membrane.
	GO:0055085	transmembrane transport	biological_process	The process in which a solute is transported across a lipid bilayer, from one side of a membrane to the other
	GO:0005215	transporter activity	molecular_function	Enables the directed movement of substances (such as macromolecules, small molecules, ions) into, out of or within a cell, or between cells.
	GO:0003824	catalytic activity	molecular_function	Catalysis of a biochemical reaction at physiological temperatures. In biologically catalyzed reactions, the reactants are known as substrates, and the catalysts are naturally occurring macromolecular substances known as enzymes. Enzymes possess specific binding sites for substrates, and are usually composed wholly or largely of protein, but RNA that has catalytic activity (ribozyme) is often also…
	GO:0016301	kinase activity	molecular_function	Catalysis of the transfer of a phosphate group, usually from ATP, to a substrate molecule.
	GO:0005525	GTP binding	molecular_function	Interacting selectively and non-covalently with GTP, guanosine triphosphate.
	GO:0005622	intracellular	cellular_component	The living contents of a cell; the matter contained within (but not including) the plasma membrane, usually taken to exclude large vacuoles and masses of secretory or ingested material. In eukaryotes it includes the nucleus and cytoplasm.
	GO:0007165	signal transduction	biological_process	The cellular process in which a signal is conveyed to trigger a change in the activity or state of a cell. Signal transduction begins with reception of a signal (e.g. a ligand binding to a receptor or receptor activation by a stimulus such as light), or for signal transduction in the absence of ligand, signal-withdrawal or the activity of a constitutively active receptor. Signal transduction ends…
	GO:0007264	small GTPase mediated signal transduction	biological_process	Any series of molecular signals in which a small monomeric GTPase relays one or more of the signals.
	GO:0016020	membrane	cellular_component	A lipid bilayer along with all the proteins and protein complexes embedded in it an attached to it.
HMA	GO:0000166	nucleotide binding	molecular_function	Interacting selectively and non-covalently with a nucleotide, any compound consisting of a nucleoside that is esterified with (ortho)phosphate or an oligophosphate at any hydroxyl group on the ribose or deoxyribose.
	GO:0006812	cation transport	biological_process	The directed movement of cations, atoms or small molecules with a net positive charge, into, out of or within a cell, or between cells, by means of some agent such as a transporter or pore.
	GO:0016021	integral component of membrane	cellular_component	The component of a membrane consisting of the gene products and protein complexes having at least some part of their peptide sequence embedded in the hydrophobic region of the membrane.
	GO:0019829	cation-transporting ATPase activity	molecular_function	Catalysis of the transfer of a solute or solutes from one side of a membrane to the other according to the reaction: ATP + H2O + cation(out) = ADP + phosphate + cation(in).
	GO:0046872	metal ion binding	molecular_function	Interacting selectively and non-covalently with any metal ion.
	GO:0030001	metal ion transport	biological_process	The directed movement of metal ions, any metal ion with an electric charge, into, out of or within a cell, or between cells, by means of some agent such as a transporter or pore.
	GO:0005507	copper ion binding	molecular_function	Interacting selectively and non-covalently with copper (Cu) ions.
