# Supplementary material for: Genome-wide identification of ATP binding cassette (ABC) transporter and heavy metal associated (HMA) gene families in flax (Linum usitatissimum L.)
Source: BMC Genomics. 2020 Oct 19;21:722. doi: 10.1186/s12864-020-07121-9 (PMC7574471; doi:10.1186/s12864-020-07121-9)
Supplement: Supplementary file 8 — Additional file 8: Table S7. Pearson correlation coefficients of syntenic gene pairs and their functional evolution. [file 12864_2020_7121_MOESM8_ESM.xlsx]

## Sheet: Table S7
Table S7. Pearson correlation coefficients of the flax syntenic pairs and their functional evolution.
Gene 1	Gene 2	Gene duplications	Pearson correlation coefficients	Functional evolution
ABCA1	ABCA2	WGD or Segmental	0.814343	Functional Conservation
ABCB43	ABCB45	WGD or Segmental	-0.522183	Neofunctionalization
ABCB38	ABCB42	WGD or Segmental	0.703972	Functional Conservation
ABCB14	ABCB13	WGD or Segmental	0.875043	Functional Conservation
ABCB33	ABCB32	WGD or Segmental	0.915052	Functional Conservation
ABCB16	ABCB15	WGD or Segmental	0.905572	Functional Conservation
ABCB11	ABCB12	WGD or Segmental	0.834592	Functional Conservation
ABCB28	ABCB29	WGD or Segmental	0.944389	Functional Conservation
ABCB35	ABCB34	WGD or Segmental	0.706558	Functional Conservation
ABCB19	ABCB20	WGD or Segmental	0.0680674	Neofunctionalization
ABCB27	ABCB26	WGD or Segmental	0.893108	Functional Conservation
ABCB22	ABCB23	WGD or Segmental	0.870716	Functional Conservation
ABCB25	ABCB24	WGD or Segmental	-0.0722189	Neofunctionalization
ABCC15	ABCC16	WGD or Segmental	0.969934	Functional Conservation
ABCC13	ABCC12	WGD or Segmental	0.711981	Functional Conservation
ABCC17	ABCC18	WGD or Segmental	0.500908	Functional Conservation
ABCC1	ABCC2	WGD or Segmental	0.924177	Functional Conservation
ABCC6	ABCC5	WGD or Segmental	0.957995	Functional Conservation
ABCC10	ABCC9	WGD or Segmental	0.899774	Functional Conservation
ABCE2	ABCE1	WGD or Segmental	0.423275	Functional Conservation
ABCF8	ABCF7	WGD or Segmental	0.896741	Functional Conservation
ABCF2	ABCF1	WGD or Segmental	0.917223	Functional Conservation
ABCF5	ABCF6	WGD or Segmental	0.923969	Functional Conservation
ABCG71	ABCG72	WGD or Segmental	0.388782	Functional Conservation
ABCG61	ABCG64	WGD or Segmental	0.8313	Functional Conservation
ABCG67	ABCG66	WGD or Segmental	0.619822	Functional Conservation
ABCG42	ABCG68	WGD or Segmental	0.520982	Functional Conservation
ABCG81	ABCG78	WGD or Segmental	0.6551	Functional Conservation
ABCG7	ABCG6	WGD or Segmental	0.875852	Functional Conservation
ABCG14	ABCG12	WGD or Segmental	0.482667	Functional Conservation
ABCG4	ABCG2	WGD or Segmental	-0.657679	Neofunctionalization
ABCG37	ABCG40	WGD or Segmental	0.864206	Functional Conservation
ABCG38	ABCG41	WGD or Segmental	0.0520864	Neofunctionalization
ABCG43	ABCG28	WGD or Segmental	0.55778	Functional Conservation
ABCG29	ABCG30	WGD or Segmental	0.430705	Functional Conservation
ABCG47	ABCG46	WGD or Segmental	0.698841	Functional Conservation
ABCG44	ABCG45	WGD or Segmental	0.736662	Functional Conservation
ABCG48	ABCG49	WGD or Segmental	-0.681046	Neofunctionalization
ABCG27	ABCG26	WGD or Segmental	0.536746	Functional Conservation
ABCG21	ABCG23	WGD or Segmental	-0.202584	Neofunctionalization
ABCG24	ABCG25	WGD or Segmental	0.60832	Functional Conservation
ABCG20	ABCG19	WGD or Segmental	0.749538	Functional Conservation
ABCG50	ABCG54	WGD or Segmental	0.702919	Functional Conservation
ABCG4	ABCG3	WGD or Segmental	0.527284	Functional Conservation
ABCG51	ABCG56	WGD or Segmental	-0.264279	Neofunctionalization
LuABCH21	ABCH20	WGD or Segmental	0.980995	Functional Conservation
ABCG16	ABCG11	Tandem	0.857717	Functional Conservation
LuABCD2	ABCD3	Tandem	0.971818	Functional Conservation
LuHMA1	LuHMA2	WGD or Segmental	0.408617	Functional Conservation
LuHMA6	LuHMA8	WGD or Segmental	-0.463534	Neofunctionalization
LuHMA9	LuHMA10	WGD or Segmental	0.300163	Functional Conservation
